# Supplementary material for: Peptidome-Based Serotyping of The Food-Borne Pathogens Salmonella Enterica by Label-Free Mass Spectrometry
Source: Research Square preprint supplement (doi:10.21203/rs.3.rs-107261/v1), 2020-11-18
Supplement: Supplementary file 1 [file 5d847a5b10b60640e3aa0dca.xlsx]

## Sheet: Sheet2
2162_1	2162_2	2431_1	2431_2	2431_3	2444_1	2444_2	2507_1	2507_2	2533_1	2533_2	JY07_1	JY07_2	JY07_3	RSD	C: Only identified by site	C: Reverse	C: Potential contaminant	C: ANOVA Significant	N: Peptides	N: Razor + unique peptides	N: Unique peptides	N: Sequence coverage [%]	N: Unique + razor sequence coverage [%]	N: Unique sequence coverage [%]	N: Mol. weight [kDa]	N: Q-value	N: Score	N: Intensity	N: MS/MS count	N: -Log ANOVA p value	Gene names	N: ANOVA q-value	T: Majority protein IDs	EC number	Accepted name	Reaction
0	0	0	0	0	0	0	23.4405	24.3733	0	0	0	0	0	245.003				+	2	2	2	33.3	33.3	33.3	6.5376	0.0021598	2.3184	222780000	4	12.4559	LTSERUB_1121	0.000922156	G5QFI6
0	0	0	0	0	0	0	0	0	27.0487	26.2705	0	0	0	244.979				+	8	1	1	31.7	4.9	4.9	37.211	0.002181	2.4401	637930000	12	13.4638	glaH	0.00065529	E1WA38	EC:1.14.11
0	0	0	0	0	25.0504	24.458	0	0	0	0	0	0	0	244.969				+	3	3	3	20.3	20.3	20.3	26.374	0	4.8481	64488000	4	14.1535	C4780_23360	0.000446281	A0A2T9Q306
0	0	0	0	0	0	0	23.3416	23.8659	0	0	0	0	0	244.967				+	2	2	2	20.3	20.3	20.3	14.152	0	3.8467	114660000	3	14.4129	AMBK_19	0.000340807	I6R0Q4
0	0	0	0	0	27.0086	26.4935	0	0	0	0	0	0	0	244.962				+	2	2	1	5.1	5.1	2.1	42.235	0.0070028	1.6814	699590000	3	14.9089	wecB HMPREF3126_14285	0.000376238	A0A1F2JNK2	5.1.3.14	UDP-N-acetylglucosamine 2-epimerase	UDP-N-acetyl-α-D-glucosamine = UDP-N-acetyl-α-D-mannosamine
0	0	0	0	0	0	0	24.1944	24.5177	0	0	0	0	0	244.955				+	2	2	2	16.8	16.8	16.8	13.507	0.0021505	2.2869	235480000	2	16.2012		0.00031746	A0A1V0E5P0
27.4978	27.8389	0	0	0	0	0	0	0	0	0	0	0	0				+	3	3	3	58.1	58.1	58.1	7.0129	0	5.4321	1365600000	8	16.4579	0.000330275	rop AAV76_25100 AG53_24835 AH543_24735 AHZ72_23210 AXS89_26590 AXS89_26980 BXE85_27550 D4G10_25685 D6379_24705 D7N26_26720 DK113_24880 DKJ09_24435 DMV20_24580 DNI00_23940 DNM47_25700 DNM47_25745 DOC34_23235 DOC63_24560 DOR75_24945 DOW08_24315 DP698_25400 DPZ95_24450 DQ082_24600 DQ845_24830 DQT47_24910 DQZ13_23480 DQZ68_24130 DS251_24125 DS372_25185 DSM73_25880 DTE69_24805 DTG32_24710 ECA66_22550 …	V7U2C0;A0A271D2W4	A0A380CBB0
0	0	0	0	0	24.7556	24.4777	0	0	0	0	0	0	0	244.954				+	4	4	4	19.3	19.3	19.3	35.688	0	6.5315	75505000	5	16.7637	LTSEALA_4796	0.000340426	G5LUC3
0	0	0	0	0	0	0	23.645	23.9032	0	0	0	0	0	244.953				+	3	3	3	8.9	8.9	8.9	25.981	0	4.5013	128450000	5	16.8983	LTSESEN_3866	0.000372093	G5R333
0	0	0	0	0	0	0	0	0	24.5539	24.8057	0	0	0	244.953				+	4	2	2	74.4	30.8	30.8	4.39	0	3.1548	137140000	5	17.1151	FGF59_06455	0.000410256	A0A4P9T1K9	1.1.1.42	isocitrate dehydrogenase (NADP+)	isocitrate + NADP+ = 2-oxoglutarate + CO2 + NADPH + H+ (overall reaction)
0	0	0	0	0	0	0	23.3801	23.449	0	0	0	0	0	244.949				+	2	2	2	10.4	10.4	10.4	29.507	0	4.1777	128120000	7	21.4354	rna STY0666 t2250 ABP05_06090 AXU46_21970 CK363_08930 DSF54_05545 E2E79_11350 E2E83_11345 E2F00_11345 E2F08_10380 E2F09_11340 E2F13_09180 EIW77_20170	0	Q8Z8J4	4.6.1.21	Enterobacter ribonuclease	RNA containing adenosine-cytidine + H2O = an [RNA fragment]-3′-cytidine-3′-phosphate + a 5′-a hydroxy-adenosine -3′-[RNA fragment] (overall reaction)
0	0	0	0	0	0	0	26.1871	26.223	0	0	0	0	0	244.949				+	13	1	1	24	2.4	2.4	82.583	0	3.2457	721630000	5	24.0897	HMPREF3126_06855	0	A0A1F2K0H9
0	0	0	0	0	0	0	0	0	0	0	23.7352	26.1615	25.8211	191.705				+	3	1	1	53.1	25	25	10.455	0	3.1157	104330000	5	9.60407	LFZ47_11280	0.00192593	A0A241SD50
0	0	25.6146	25.3615	23.6607	0	0	0	0	0	0	0	0	0	191.634				+	5	5	5	30.8	30.8	30.8	21.597	0	9.0187	296110000	10	10.2893	btuR SG1396	0.00174247	B5R6N2	2.5.1.17	corrinoid adenosyltransferase	(1) 2 ATP + 2 cob(II)alamin + a reduced flavoprotein = 2 triphosphate + 2 adenosylcob(III)alamin + an oxidized flavoprotein (overall reaction)
0	0	24.326	22.9061	24.1045	0	0	0	0	0	0	0	0	0	191.569				+	2	2	2	23.4	23.4	23.4	17.401	0	3.7045	78554000	3	11.2771	LTSEADE_4145	0.00119437	G5LDG9
0	0	0	0	0	25.0013	0	24.3974	23.7561	0	0	0	0	0	191.538				+	10	1	1	88.2	8.2	8.2	17.725	0	2.6925	216340000	8	1.77908	LTSESEN_2980	0.0122491	G5R121
0	0	22.34	21.6538	22.6259	0	0	0	0	0	0	0	0	0	191.527				+	2	2	2	23.8	23.8	23.8	18.934	0	5.1159	27415000	5	12.5138	LTSEURB_3111	0.000906344	G5RX21
0	0	0	0	0	0	23.9465	0	0	24.8169	23.9813	0	0	0	191.519				+	15	1	1	85.3	13.1	13.1	28.461	0	3.5872	186890000	12	1.898	LTSEALA_1423	0.00869597	G5LLQ7
0	0	0	0	0	0	0	0	0	23.0565	23.0542	0	23.8403	0	191.516				+	2	2	2	23.6	23.6	23.6	12.153	0	2.9191	165970000	10	1.33709	guaB ERS372666_02119	0.0206656	A0A0M7NL33	1.1.1.205	IMP dehydrogenase	IMP + NAD+ + H2O = XMP + NADH + H+
0	0	22.6748	23.4864	23.186	0	0	0	0	0	0	0	0	0	191.511				+	5	5	5	11.4	11.4	11.4	65.362	0	7.456	79993000	12	13.337	dnaG SEI61121_19094	0.000724832	V1GV22	2.7.7.-
0	0	24.2833	23.5174	24.2052	0	0	0	0	0	0	0	0	0	191.51				+	5	5	5	36.9	36.9	36.9	28.681	0	9.5899	192740000	13	13.3745	trpA SeSA_A1859	0.000700337	B4TX39	4.2.1.20	tryptophan synthase	L-serine + 1-C-(indol-3-yl)glycerol 3-phosphate = L-tryptophan + D-glyceraldehyde 3-phosphate + H2O (overall reaction)
0	0	26.4288	25.894	25.5558	0	0	0	0	0	0	0	0	0	191.509				+	3	2	2	16.5	16.5	16.5	10.518	0	3.7241	502390000	6	13.4962		0.000662069	Q7M159
0	0	0	0	0	0	0	0	0	0	0	24.513	25.3299	24.9946	191.507				+	5	1	1	41.1	15.5	15.5	22.738	0	3.8934	82376000	13	13.5992	eutL NGUA41_02949	0.00059364	A0A100V1V3
0	0	0	0	0	0	0	0	0	0	0	23.6363	23.9932	23.2517	191.505				+	4	2	2	26.5	12.6	12.6	31.828	0	10.958	61175000	28	13.7644	prpB A464_318	0.000526316	S5MS87	4.1.3.30	methylisocitrate lyase	2S,3R)-3-hydroxybutane-1,2,3-tricarboxylate = succinate + pyruvate
0	0	0	0	0	0	0	0	0	0	0	25.9565	26.663	25.9601	191.505				+	5	5	5	66.7	66.7	66.7	16.118	0	10.705	416070000	28	13.8004	LTSEINV_3680	0.000530303	G5NFU0
0	0	0	0	0	22.9961	0	0	0	23.4395	23.7075	0	0	0	191.505				+	6	2	2	56.3	14.3	14.3	13.72	0	7.1849	67699000	7	1.91262	guaB FGF59_13575	0.00833761	A0A4P9T5N9	1.1.1.205	IMP dehydrogenase	IMP + NAD+ + H2O = XMP + NADH + H+
0	0	25.4733	24.9179	25.6341	0	0	0	0	0	0	0	0	0	191.503				+	22	1	0	56.5	3.5	0	53.763	0	2.8749	273190000	13	13.9619	prpD SCH_0411	0.0005	Q57SJ4
0	0	22.9845	23.234	23.6638	0	0	0	0	0	0	0	0	0	191.503				+	3	3	3	23.1	23.1	23.1	24.559	0	6.5036	67068000	4	13.9797	LTSEWAN_2517	0.000454902	G5SBI1
0	0	23.637	23.4182	24.0986	0	0	0	0	0	0	0	0	0	191.503				+	4	4	4	5.9	5.9	5.9	107.51	0	7.034	109740000	11	14.0047	LTSEADE_4191	0.000460317	G5LDK4
0	0	0	0	0	23.7946	23.8918	0	0	23.2838	0	0	0	0	191.501				+	3	3	3	21.9	21.9	21.9	22.142	0	6.4322	273460000	10	1.91047	ubiJ yigP STM3971	0.00838863	Q9L6M5
0	0	0	0	0	0	0	0	0	0	0	25.4463	26.1222	25.7579	191.499				+	4	4	4	29.3	29.3	29.3	26.222	0	8.0751	264680000	15	14.3857	LTSEMON_3171	0.000387665	G5Q4Z2
0	0	25.0745	24.5456	24.5314	0	0	0	0	0	0	0	0	0	191.498				+	3	3	3	25.6	25.6	25.6	18.818	0	7.1259	143190000	7	14.5488	LTSEURB_3183	0.000347032	G5RX76	4.3.2.10	imidazole glycerol-phosphate synthase	5-[(5-phospho-1-deoxy-D-ribulos-1-ylamino)methylideneamino]-1-(5-phospho-β-D-ribosyl)imidazole-4-carboxamide + L-glutamine = 5-amino-1-(5-phospho-β-D-ribosyl)imidazole-4-carboxamide + D-erythro-1-(imidazol-4-yl)glycerol 3-phosphate + L-glutamate (overall reaction)
0	0	23.0573	23.5485	23.0797	0	0	0	0	0	0	0	0	0	191.497				+	3	3	3	13.6	13.6	13.6	20.265	0	3.2068	76628000	5	14.7142	A670_03413	0.000358491	M7S8W3
0	0	0	0	0	0	0	0	0	0	0	25.8578	26.3906	25.8538	191.497				+	6	6	4	64.8	64.8	50.8	21.504	0	15.699	264970000	17	14.7373	LTSERUB_2322	0.000361905	G5QIF0
0	0	23.6009	23.8406	24.1338	0	0	0	0	0	0	0	0	0	191.496				+	3	3	1	14.1	14.1	6.6	29.055	0	4.7845	93687000	5	14.9407	ddpX FGF59_08360	0.000383838	A0A4P9T2H2	3.4.13.22	D-Ala-D-Ala dipeptidase	D-Ala-D-Ala + H2O = 2 D-Ala
0	0	0	0	0	0	0	0	0	0	0	31.0456	30.6015	31.2787	191.495				+	3	2	2	16	9.2	9.2	14.212	0	3.3732	39784000000	57	14.9657	HMPREF3126_11915	0.000365482	A0A1F2JS61
0	0	24.8217	24.3097	24.4457	0	0	0	0	0	0	0	0	0	191.495				+	3	3	3	13.9	13.9	13.9	42.867	0	5.9891	313830000	7	15.0585	trpB SPA1151	0.000375	Q5PD17	4.2.1.20	tryptophan synthase	L-serine + 1-C-(indol-3-yl)glycerol 3-phosphate = L-tryptophan + D-glyceraldehyde 3-phosphate + H2O (overall reaction)
0	25.6199	0	0	0	26.1777	25.8841	0	0	0	0	0	0	0	191.495				+	2	2	2	21.7	21.7	21.7	14.07	0	3.9845	936680000	9	1.89328	A670_05134	0.00886734	M7S414
0	0	25.0609	24.6083	25.0738	0	0	0	0	0	0	0	0	0	191.495				+	3	3	3	8.6	8.6	8.6	54.27	0	4.3253	212240000	4	15.1142	sbcB SEI61121_05561	0.000338624	V1H1I6	3.1.11.1	xodeoxyribonuclease I	Exonucleolytic cleavage in the 3′- to 5′-direction to yield nucleoside 5′-phosphates
0	0	0	0	0	0	0	0	0	0	0	26.3904	25.9591	25.8811	191.494				+	33	1	0	56.4	2.4	0	82.264	0	2.9654	464130000	6	15.1541	LTSEWAN_0361	0.000347826	G5S6H3
0	0	23.5373	23.9191	23.4529	0	0	0	0	0	0	0	0	0	191.494				+	4	4	4	8.3	8.3	8.3	55.714	0	4.1294	86107000	6	15.1577	LTSEWAN_0231	0.000349727	G5S662	2.2.1.6	acetolactate synthase	2 pyruvate = 2-acetolactate + CO2
0	0	23.3668	23.1483	23.6138	0	0	0	0	0	0	0	0	0	191.493				+	3	3	3	16.8	16.8	16.8	28.037	0	3.233	135870000	5	15.3435	ubiE LTSEWAN_5766	0.000365714	G5SJ55	2.1.1.163; 2.1.1.201	demethylmenaquinone methyltransferase/ 2-methoxy-6-polyprenyl-1,4-benzoquinol methylase	a demethylmenaquinol + S-adenosyl-L-methionine = a menaquinol + S-adenosyl-L-homocysteine/S-adenosyl-L-methionine + 2-methoxy-6-all-trans-polyprenyl-1,4-benzoquinol = S-adenosyl-L-homocysteine + 6-methoxy-3-methyl-2-all-trans-polyprenyl-1,4-benzoquinol
0	0	0	0	0	0	0	0	0	0	0	24.1352	24.375	23.9157	191.493				+	3	3	3	13	13	13	34.5	0	4.323	64192000	11	15.5025	LTSEUGA_4147	0.00035503	G5RJW6	2.7.6.5	GTP diphosphokinase	ATP + GTP = AMP + guanosine 3′-diphosphate 5′-triphosphate
0	0	24.9164	25.2766	25.3701	0	0	0	0	0	0	0	0	0	191.493				+	4	4	4	21.9	21.9	21.9	29.702	0	6.5428	351330000	8	15.5044	yidA STY3947 t3688 ABP05_17820 AXU46_19515 CK363_17440 DSF54_16190 E2E79_20630 E2E83_20620 E2F08_20905 E2F09_20360 E2F13_20595 EIW77_18635	0.000357143	Q8Z2N0
0	0	24.9889	24.7194	25.1868	0	0	0	0	0	0	0	0	0	191.493				+	6	1	1	16.8	3.6	3.6	70.831	0	2.9426	206890000	5	15.5459	cpdB b4213 JW4171	0.000363636	P08331	3.1.3.6; 3.1.4.16	3′-nucleotidase/ 2′,3′-cyclic-nucleotide 2′-phosphodiesterase	a 3′-ribonucleotide + H2O = a ribonucleoside + phosphate/nucleoside 2′,3′-cyclic phosphate + H2O = nucleoside 3′-phosphate
0	0	25.0449	25.3019	25.493	0	0	0	0	0	0	0	0	0	191.492				+	5	5	5	26.9	26.9	26.9	25.347	0	8.056	286000000	7	15.7378	LTSEMON_2285	0.000356688	G5Q2U4
0	0	23.388	23.7969	23.5422	0	0	0	0	0	0	0	0	0	191.492				+	3	3	3	12.7	12.7	12.7	36.494	0	5.7616	96625000	5	15.7904	yiaK dlgD SG3763	0.00036129	B5RGK9	1.1.1.130	3-dehydro-L-gulonate 2-dehydrogenase	3-dehydro-L-gulonate + NAD(P)+ = (4R,5S)-4,5,6-trihydroxy-2,3-dioxohexanoate + NAD(P)H + H+
0	0	22.9922	23.1138	23.3872	0	0	0	0	0	0	0	0	0	191.492				+	3	3	3	29.8	29.8	29.8	18.186	0	4.25	64207000	9	15.8006	LTSEURB_3639	0.000366013	G5RY70
0	0	24.6927	24.5517	24.9702	0	0	0	0	0	0	0	0	0	191.491				+	4	4	4	36.5	36.5	36.5	19.922	0	8.1995	187860000	8	15.8514	LTSEINV_3660	0.000351351	G5NFS7
0	0	24.9714	24.5844	24.8819	0	0	0	0	0	0	0	0	0	191.491				+	4	4	4	10.4	10.4	10.4	57.086	0	6.6028	189650000	8	16.0345	SEENIN0B_04846	0.000291971	G4CAA7
0	0	25.1728	25.5574	25.2417	0	0	0	0	0	0	0	0	0	191.491				+	5	5	5	16.7	16.7	16.7	41.671	0	8.1143	1217600000	6	16.0633	rnd A464_1918	0.000300752	S5MWR1	3.1.13.5	Ribonuclease D	Exonucleolytic cleavage that removes extra residues from the 3′-terminus of tRNA to produce 5′-mononucleotides
0	0	22.9127	23.2469	22.9545	0	0	0	0	0	0	0	0	0	191.49				+	4	4	4	9	9	9	63.516	0	9.7817	55101000	6	16.1471	LTSEURB_4973	0.000310078	G5S179
0	0	24.0047	24.3345	24.0068	0	0	0	0	0	0	0	0	0	191.49				+	4	4	4	34.3	34.3	34.3	22.797	0	6.4303	129670000	8	16.1619	LTSESEN_4331	0.0003125	G5R457
0	0	26.7887	26.3733	26.6164	0	0	0	0	0	0	0	0	0	191.49				+	5	5	4	34.4	34.4	27.5	26.927	0	10.603	711280000	17	16.1722	sul3	0.000314961	A1YJL7
0	0	0	0	26.2319	26.5125	26.1822	0	0	0	0	0	0	0	191.489				+	7	1	1	34.3	6.5	6.5	22.485	0	3.3401	881970000	22	1.41402	gstA RF16_10255	0.0181416	A0A3V2XY06
